# Supplementary material for: The Impact of Diet and Physical Activity on Fat-to-Lean Mass Ratio
Source: MDPI journal article supplement (doi:10.3390/nu16010019), 2023-12-20
Supplement: s1 [file s1]

## **Supplementary File S1: Sample Low-Calorie Mediterranean Diet Meal Plan**

This appendix provides an example of a typical day's meal plan under the low-calorie Mediterranean Diet used in our study. The plan is nutritionally balanced, adhering to the Mediterranean diet principles while maintaining a suitable caloric content for weight management.

Total Daily Caloric Intake: Approximately 1500-1700 Kcal

### **Breakfast**

White milk yogurt: 120 g

Whole grain bread: 60 g

Fresh fruit juice (two fruits + vegetables): 150 g

*Caloric Content: ~300-350 Kcal*

### **Mid-Morning Snack**

Fresh fruit (e.g., apple, pear): 150 g

Nuts (low- salt): 10 g

*Caloric Content: ~150-200 Kcal*

### **Lunch**

Brown rice: 60 g

Legumes : 80 g or Grilled fish (e.g., Anchovies): 80 g

Freshly cooked vegetables (e.g., steamed broccoli, carrots): 300 g

“Extra virgin” olive oil 15g

*Caloric Content: ~450-500 Kcal*

### **Afternoon Snack**

Fresh fruit (e.g., orange): 150 g

Soy or 2% Greek yogurt: 120 g

*Caloric Content: ~150-200 Kcal*

### **Dinner**

Whole grain pasta: 80 g

Freshly cooked vegetables (e.g., steamed broccoli, carrots): 300 g

“Extra virgin” olive oil 15g

*Caloric Content: ~300-350 Kcal*

Note: This meal plan is a guideline and can be adjusted according to individual dietary needs and preferences. Portion sizes and ingredients can be varied to meet specific calorie targets and nutritional requirements. All weights mentioned are for raw ingredients.
