# Supplementary material for: The Impact of Diet and Physical Activity on Fat-to-Lean Mass Ratio
Source: MDPI journal article supplement (doi:10.3390/nu16010019), 2023-12-20
Supplement: s1 [file s1]

**Table 1S.** - Body composition of all subjects before and after the two months' study.

| Variable            | T0              | T1              | $\Delta$ (T1-T0) | p      |
|---------------------|-----------------|-----------------|------------------|--------|
| <b>Whole Sample</b> |                 |                 |                  |        |
| WEIGHT (kg)         | 82.7 $\pm$ 20.0 | 79.7 $\pm$ 19.3 | -2.9 $\pm$ 1.8   | <0.001 |
| BMI (Kg/m2)         | 28.7 $\pm$ 5.4  | 27.7 $\pm$ 5.3  | -1.0 $\pm$ 0.6   | <0.001 |
| FM (kg)             | 25.9 $\pm$ 10.5 | 23.5 $\pm$ 9.8  | -2.4 $\pm$ 1.7   | <0.001 |
| FM (%)              | 30.7 $\pm$ 7.8  | 28.9 $\pm$ 7.9  | -1.8 $\pm$ 1.5   | <0.001 |
| FFM (kg)            | 54 $\pm$ 12.9   | 53.5 $\pm$ 12.9 | -0.5 $\pm$ 1.4   | 0.0012 |
| FM-to-FFM ratio     | 0.49 $\pm$ 0.18 | 0.45 $\pm$ 0.18 | -0.04 $\pm$ 0.03 | <0.001 |
| TBW (kg)            | 40.4 $\pm$ 9.7  | 39.8 $\pm$ 9.5  | -0.6 $\pm$ 1.0   | <0.001 |
| Body Protein (Kg)   | 13.4 $\pm$ 3.6  | 13.7 $\pm$ 3.5  | 0.3 $\pm$ 1.0    | 0.0049 |
| <b>Females</b>      |                 |                 |                  |        |
| WEIGHT (kg)         | 73.1 $\pm$ 14.5 | 70.6 $\pm$ 13.9 | -2.5 $\pm$ 1.8   | <0.001 |
| BMI (Kg/m2)         | 27.2 $\pm$ 5.1  | 26.3 $\pm$ 4.9  | -0.9 $\pm$ 0.6   | <0.001 |
| FM (kg)             | 25.4 $\pm$ 10.4 | 23.4 $\pm$ 10.0 | -2.1 $\pm$ 1.4   | <0.001 |
| FM (%)              | 33.6 $\pm$ 6.9  | 31.9 $\pm$ 7.3  | -1.7 $\pm$ 1.4   | <0.001 |
| FFM (kg)            | 45.3 $\pm$ 5.3  | 45.0 $\pm$ 5.2  | -0.4 $\pm$ 1.2   | 0.0270 |
| FM-to-FFM ratio     | 0.55 $\pm$ 0.18 | 0.51 $\pm$ 0.18 | -0.04 $\pm$ 0.03 | <0.001 |
| TBW (kg)            | 33.8 $\pm$ 4.4  | 33.5 $\pm$ 4.2  | -0.4 $\pm$ 1.0   | 0.0079 |
| Body Protein (Kg)   | 11.1 $\pm$ 1.4  | 11.5 $\pm$ 1.2  | 0.4 $\pm$ 1.0    | 0.0079 |
| <b>Males</b>        |                 |                 |                  |        |
| WEIGHT (kg)         | 97.0 $\pm$ 18.6 | 93.5 $\pm$ 18.1 | -3.5 $\pm$ 1.7   | <0.001 |
| BMI (Kg/m2)         | 31.0 $\pm$ 5.2  | 29.9 $\pm$ 5.0  | -1.1 $\pm$ 0.5   | <0.001 |
| FM (kg)             | 26.5 $\pm$ 10.8 | 23.6 $\pm$ 9.8  | -2.8 $\pm$ 2.0   | <0.001 |
| FM (%)              | 26.3 $\pm$ 7.1  | 24.4 $\pm$ 6.7  | -1.9 $\pm$ 1.6   | <0.001 |
| FFM (kg)            | 67.1 $\pm$ 9.5  | 66.5 $\pm$ 9.8  | -0.7 $\pm$ 1.7   | 0.0190 |
| FM-to-FFM ratio     | 0.39 $\pm$ 0.14 | 0.35 $\pm$ 0.13 | -0.04 $\pm$ 0.04 | <0.001 |
| TBW (kg)            | 50.2 $\pm$ 6.8  | 49.4 $\pm$ 7.0  | -0.8 $\pm$ 0.9   | <0.001 |

|                      |             |             |              |        |
|----------------------|-------------|-------------|--------------|--------|
| Body Protein (Kg)    | 16.9 ± 3.2  | 17.1 ± 3.2  | 0.2 ± 1.0    | 0.2496 |
| <b>BMI 18.5-24.9</b> |             |             |              |        |
| WEIGHT (kg)          | 63.2 ± 6.7  | 61.1 ± 6.6  | -2.1 ± 1.5   | <0.001 |
| BMI (Kg/m2)          | 23.0 ± 1.5  | 22.2 ± 1.4  | -0.8 ± 0.6   | <0.001 |
| FM (kg)              | 15.8 ± 4.2  | 14.1 ± 4.0  | -1.7 ± 1.1   | <0.001 |
| FM (%)               | 25.1 ± 6.2  | 23.1 ± 5.8  | -2.0 ± 1.5   | <0.001 |
| FFM (kg)             | 45.1 ± 6.8  | 44.8 ± 6.4  | -0.4 ± 1.0   | 0.0598 |
| FM-to-FFM ratio      | 0.37 ± 0.12 | 0.33 ± 0.11 | -0.04 ± 0.03 | <0.001 |
| TBW (kg)             | 33.3 ± 5.2  | 33.0 ± 4.8  | -0.4 ± 0.8   | 0.0230 |
| Body Protein (Kg)    | 11.7 ± 1.9  | 11.8 ± 1.7  | 0.1 ± 0.7    | 0.4847 |
| <b>BMI 25-29.9</b>   |             |             |              |        |
| WEIGHT (kg)          | 77.3 ± 10.0 | 74.7 ± 9.8  | -2.5 ± 1.2   | <0.001 |
| BMI (Kg/m2)          | 27.5 ± 1.5  | 26.6 ± 1.4  | -0.9 ± 0.4   | <0.001 |
| FM (kg)              | 24.1 ± 4.8  | 22.1 ± 4.7  | -2.0 ± 0.9   | <0.001 |
| FM (%)               | 31.5 ± 6.3  | 29.9 ± 6.5  | -1.6 ± 1.0   | <0.001 |
| FFM (kg)             | 50.5 ± 9.9  | 50.0 ± 9.9  | -0.5 ± 1.1   | 0.0087 |
| FM-to-FFM ratio      | 0.49 ± 0.13 | 0.45 ± 0.13 | -0.04 ± 0.03 | <0.001 |
| TBW (kg)             | 37.5 ± 7.1  | 37.2 ± 7.1  | -0.4 ± 0.8   | 0.0094 |
| Body Protein (Kg)    | 12.7 ± 3.2  | 12.8 ± 3.0  | 0.2 ± 0.8    | 0.1191 |
| <b>BMI 30-34.9</b>   |             |             |              |        |
| WEIGHT (kg)          | 93.6 ± 8.5  | 90.0 ± 8.6  | -3.6 ± 1.6   | <0.001 |
| BMI (Kg/m2)          | 31.7 ± 1.3  | 30.5 ± 1.5  | -1.2 ± 0.6   | <0.001 |
| FM (kg)              | 29.8 ± 5.5  | 26.9 ± 5.5  | -2.9 ± 2.0   | <0.001 |
| FM (%)               | 32.0 ± 6.5  | 30.1 ± 6.5  | -1.9 ± 2.0   | 0.0010 |
| FFM (kg)             | 60.6 ± 9.2  | 60.0 ± 8.7  | -0.6 ± 1.8   | 0.1724 |
| FM-to-FFM ratio      | 0.61 ± 0.19 | 0.56 ± 0.17 | -0.05 ± 0.05 | 0.001  |
| TBW (kg)             | 45.6 ± 6.4  | 44.8 ± 6.2  | -0.9 ± 1.1   | 0.0030 |
| Body Protein (Kg)    | 15.0 ± 3.2  | 15.3 ± 2.8  | 0.3 ± 1.1    | 0.3148 |
| <b>Age 18-29</b>     |             |             |              |        |
| WEIGHT (kg)          | 77.6 ± 13.4 | 74.7 ± 12.6 | -2.9 ± 1.3   | <0.001 |
| BMI (Kg/m2)          | 26.1 ± 2.4  | 25.7 ± 3.2  | -1 ± 0.4     | <0.001 |
| FM (kg)              | 21.9 ± 7.7  | 19.8 ± 7.3  | -2.1 ± 1.0   | <0.001 |

|                   |             |               |              |        |
|-------------------|-------------|---------------|--------------|--------|
| FM (%)            | 28.1 ± 8.2  | 26.4 ± 8.1    | -1.8 ± 1.1   | <0.001 |
| FFM (kg)          | 53.0 ± 10.9 | 52.3 ± 10.4   | -0.7 ± 1.0   | 0.001  |
| FM-to-FFM ratio   | 0.43 ± 0.17 | 0.39 ± 0.16   | -0.04 ± 0.02 | <0.001 |
| TBW (kg)          | 39.6 ± 7.6  | 39.1 ± 7.5    | -0.5 ± 1.0   | 0.001  |
| Body Protein (Kg) | 13.2 ± 3.4  | 13.2 ± 3.2    | -0.01 ± 0.6  | 0.928  |
| <b>Age 30-49</b>  |             |               |              |        |
| WEIGHT (kg)       | 84.5 ± 29   | 81.5 ± 21.7   | -3.0 ± 2.0   | <0.001 |
| BMI (Kg/m2)       | 29 ± 5.7    | 28 ± 5.5      | -1.0 ± 0.7   | <0.001 |
| FM (kg)           | 26.3 ± 10.4 | 23.7 ± 9.4    | -2.6 ± 1.9   | <0.001 |
| FM (%)            | 30.6 ± 6.9  | 28.6 ± 6.9    | -2.1 ± 1.6   | <0.001 |
| FFM (kg)          | 55.3 ± 14.4 | 55.0 ± 14.4   | -0.3 ± 1.6   | 0.226  |
| FM-to-FFM ratio   | 0.48 ± 0.16 | 0.43 ± 0.15   | -0.05 ± 0.03 | <0.001 |
| TBW (kg)          | 41.2 ± 10.9 | 40.7 ± 10.7   | -0.5 ± 1.0   | 0.009  |
| Body Protein (Kg) | 13.9 ± 3.9  | 14.3 ± 3.8    | 0.4 ± 1.1    | 0.0111 |
| <b>Age 50-65</b>  |             |               |              |        |
| WEIGHT (kg)       | 86.7 ± 20.1 | 84.05 ± 19.55 | -2.6 ± 1.9   | 0.001  |
| BMI (Kg/m2)       | 32.8 ± 6.3  | 31.79 ± 6.22  | -1.0 ± 0.7   | 0.0009 |
| FM (kg)           | 33.9 ± 13.1 | 32.38 ± 12.90 | -1.6 ± 1.7   | 0.0124 |
| FM (%)            | 38.1 ± 7.2  | 37.44 ± 7.21  | -0.7 ± 1.3   | 0.1148 |
| FFM (kg)          | 50.1 ± 9.3  | 48.91 ± 8.95  | -1.2 ± 1.6   | 0.0312 |
| FM-to-FFM ratio   | 0.67 ± 0.22 | 0.66 ± 0.22   | -0.02 ± 0.04 | 0.2184 |
| TBW (kg)          | 37.9 ± 8    | 36.9 ± 7.7    | -1.0 ± 1.0   | 0.0107 |
| Body Protein (Kg) | 11.4 ± 2.3  | 12.0 ± 1.6    | 0.6 ± 1.0    | 0.0927 |

This table presents the mean ± SD for each variable at baseline (T0) and follow-up (T1), along with the change ( $\Delta$ ) and p-value. It includes data for the whole sample and subgroups based on BMI and age. Variables include weight, BMI, fat mass (FM), fat-free mass (FFM), total body water (TBW), and body protein. n: number of subjects. Abbreviations: T0 = Baseline, T1 = Follow-up,  $\Delta$  = Change from T0 to T1, p = p-value. Independent sample t-tests were used to determine the statistical significance for the P-values presented.
